# Supplementary material
Source: MDPI journal article supplement (https://www.mdpi.com/1660-4601/11/6/6193)
Supplement: s1 [file s1]

## Dietary Phthalate Exposure in Pregnant Women and the Impact of Consumer Practices

---

### Food Consumption and Consumer Practice Questions in the Tides First Trimester Questionnaire

*Questions 13 through 21 are about your lifestyle and diet.*

*The following questions are about the kinds of products and foods you choose to buy and consume and why you choose them. Select one answer per question.*

15. When I buy personal care products (such as cosmetics and toiletries), I try to make sure they are ecofriendly, chemical-free or environmentally friendly.
- ☐ Always
- ☐ Usually
- ☐ Sometimes
- ☐ Rarely
- ☐ Never
16. When I buy things for my home (such as household products, furniture, and upholstery), I try to make sure they are ecofriendly, chemical-free or environmentally friendly.
- ☐ Always
- ☐ Usually
- ☐ Sometimes
- ☐ Rarely
- ☐ Never
17. When I consume food, I try to make sure it is organic, ecofriendly, chemical-free or environmentally friendly.
- ☐ Always
- ☐ Usually
- ☐ Sometimes
- ☐ Rarely
- ☐ Never

20. How often do you try to make sure that the food and beverages you consume come in plastics that you think are safe?
- ☐ Always
  - ☐ Usually
  - ☐ Sometimes
  - ☐ Rarely
  - ☐ Never
  - ☐ Don't Know
21. How often do you check the recycling code on the bottle?
- ☐ Always
  - ☐ Usually
  - ☐ Sometimes
  - ☐ Rarely
  - ☐ Never

**Questions 22 through 25c, are about your typical diet. For each one, choose one answer from among the following options: always, usually, sometimes, rarely, never, don't know.**

22. Since you became pregnant, how often have you consumed foods marked “organic”, “pesticide-free”, or “chemical-free”?
- ☐ Always
  - ☐ Usually
  - ☐ Sometimes
  - ☐ Rarely
  - ☐ Never
  - ☐ Don't Know
23. Since you became pregnant, how often have you consumed food that is grown, raised, or caught by you or your family and friends (as opposed to bought in a store)?
- ☐ Always
  - ☐ Usually
  - ☐ Sometimes
  - ☐ Rarely
  - ☐ Never

☐ Don't Know

24. Since you became pregnant, how often have you consumed food that is unprocessed (as opposed to canned, frozen, dried, cooked, processed, pre-prepared, or packaged)?

☐ Always

☐ Usually

☐ Sometimes

☐ Rarely

☐ Never

☐ Don't Know

25a. Since you became pregnant, when you consume fruit or vegetables, how often are they canned?

☐ Always

☐ Usually

☐ Sometimes

☐ Rarely

☐ Never

☐ Don't Know

25b. Since you became pregnant, when you consume fruit or vegetables, how often are they frozen?

☐ Always

☐ Usually

☐ Sometimes

☐ Rarely

☐ Never

☐ Don't Know

25c. Since you became pregnant, when you consume fruit or vegetables, how often are they fresh?

☐ Always

☐ Usually

☐ Sometimes

☐ Rarely

☐ Never

☐ Don't Know

26. Now think about the foods you've eaten in a typical week. For each item, please estimate the number of servings eaten in a typical week.

---

|                                                                                       |                                  |
|---------------------------------------------------------------------------------------|----------------------------------|
| (a) peanut butter (or other nut butters)?                                             | _____ servings in a typical week |
| (b) beef?                                                                             | _____ servings in a typical week |
| (c) seafood?                                                                          | _____ servings in a typical week |
| (d) poultry (such as chicken, turkey, <i>etc.</i> ...)?                               | _____ servings in a typical week |
| (e) other meats (such as pork, organ meats, lamb, <i>etc.</i> ...)?                   | _____ servings in a typical week |
| (f) spices (including salt/pepper, dried herbs, and other seasonings)?                | _____ servings in a typical week |
| (g) oils, butter, lard, or shortening?                                                | _____ servings in a typical week |
| (h) Soy products (soy milk, tofu, soy nuts, edamame, soy protein, <i>etc.</i> ...)    | _____ servings in a typical week |
| (i) Dairy products (milk, cheese, yogurt, cottage cheese, ice cream, <i>etc.</i> ...) | _____ servings in a typical week |

---

27. In a typical **week** since you became pregnant how many meals have you eaten in a restaurant, had take-out food, or had food delivered?

\_\_\_\_\_ meals

*If your answer to 27 was greater than 0, please answer 27a:*

- 27a. How many of these meals are typically fast food?

\_\_\_\_\_ meals

28. In a typical **week** since you became pregnant, how many times per **day** have you had at least a serving of a beverage that comes in a **plastic bottle**? (include water, soda, juice, milk, and any other drink you can think of. Also, include drinks that were poured out of large plastic bottles as well as drinks from individual bottles.)

\_\_\_\_\_ drinks/day

29. In a typical **week** since you became pregnant, how many times per **day** have you had at least a serving of a beverage that comes in a **can**? (include soda, juice, and any other drink you can think of. Also, include drinks that were poured out of large cans as well as drinks from individual cans).

\_\_\_\_\_ drinks/day
